# Supplementary material for: Optimization, Kinetic Studies of Tin Leaching from Waste Printed Circuit Boards and Selective Tin Recovery from Its Pregnant Solution
Source: MDPI journal article supplement (doi:10.3390/met12060954), 2022-06-01
Supplement: s1 [file metals-1732585-supplementary.pdf › metals-1732585-supplementary.pdf]

Article

# Optimization, Kinetic Studies of Tin Leaching from Waste Printed Circuit Boards and Selective Tin Recovery from Its Pregnant Solution

Juanjuan Hao <sup>1</sup>, Xiaolu Wang <sup>1</sup>, Yishu Wang <sup>1</sup>, Fu Guo <sup>1,2,3,\*</sup> and Yufeng Wu <sup>1</sup>

<sup>1</sup> Faculty of Materials and Manufacturing, Beijing University of Technology, Beijing 100124, China; Haojuanjuan@emails.bjut.edu.cn (J.H.); wangxiaolu2019@bjut.edu.cn (X.W.); yishu.wang@bjut.edu.cn (Y.W.); fograinwind@126.com (Y.W.)

<sup>2</sup> Key Laboratory of Advanced Functional Materials, Ministry of Education, Beijing 100124, China

<sup>3</sup> College of Robotics, Beijing Union University, Beijing 100101, China

\* Correspondence: guofu@bjut.edu.cn

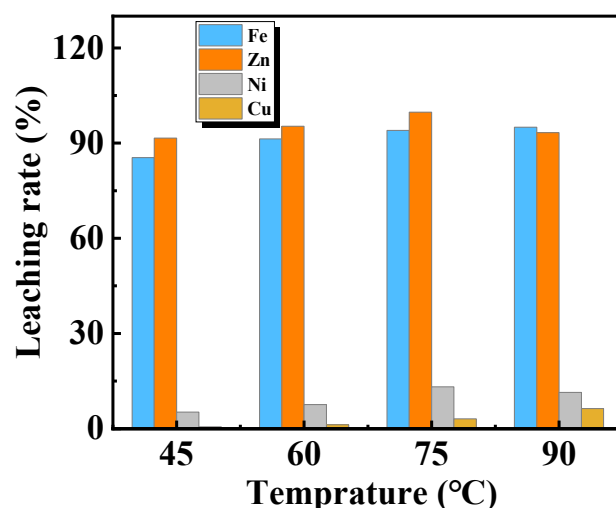

Figure S1. The effect of temperature on leaching rates of various metals.

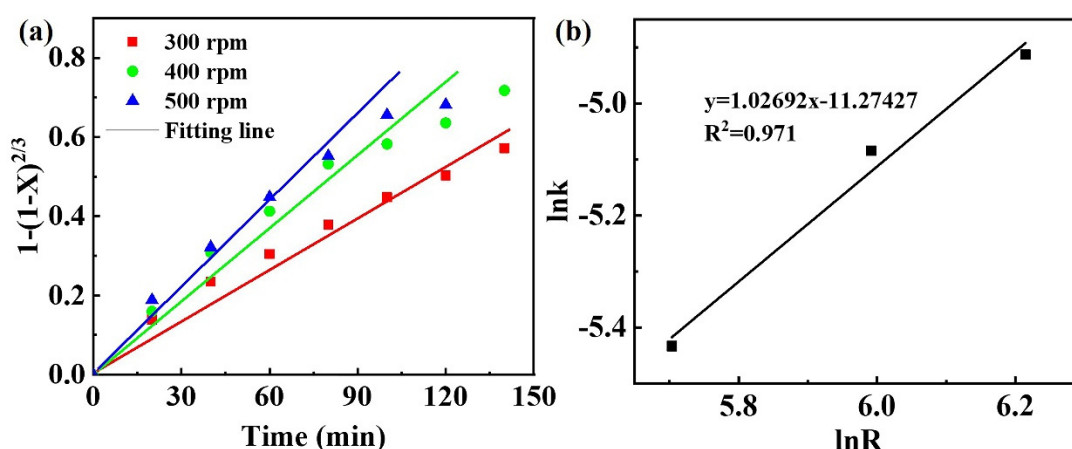

Figure S2. (a) Plot of  $[1-(1-X)^{2/3}]-t$  for Sn at different stirring speed and (b) relationship between  $\ln k$  and  $\ln R$  for Sn.

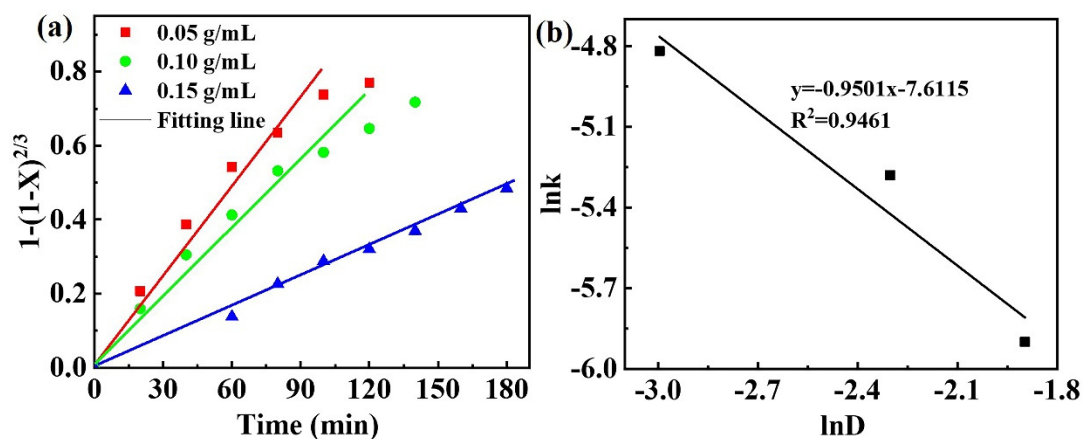

Figure S3. (a) Plot of  $[1-(1-X)^{2/3}]-t$  for Sn at different solid-liquid ratio and (b) relationship between  $\ln k$  and  $\ln D$  for Sn.

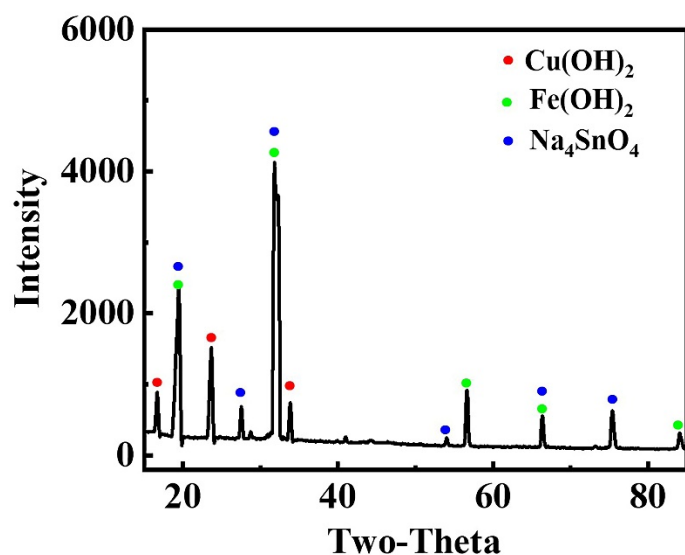

Figure S4. The XRD analysis of precipitation product obtained at pH=2.

Table S1. Fitting results of kinetic equations of Sn.

| T/K | Chemical control reaction |         | Diffusion control reaction |          | Mixed control reaction |         | Surface control reaction |          |
|-----|---------------------------|---------|----------------------------|----------|------------------------|---------|--------------------------|----------|
|     | $1-(1-X)^{1/3}=k_1t$      |         | $1-2/3X-(1-X)^{2/3}=k_2t$  |          | $1-(1-X)^{2/3}=k_3t$   |         | $1-(1-0.45X)^{1/3}=k_4t$ |          |
|     | $R^2$                     | k       | $R^2$                      | k        | $R^2$                  | k       | $R^2$                    | $k/10^3$ |
| 318 | 0.98658                   | 0.00157 | 0.96235                    | -0.25794 | 0.98321                | 0.00291 | 0.98021                  | 0.51324  |
| 333 | 0.98541                   | 0.00218 | 0.92201                    | -0.26958 | 0.97314                | 0.00401 | 0.96041                  | 0.55073  |
| 348 | 0.98034                   | 0.0034  | 0.93479                    | -0.27989 | 0.99251                | 0.00594 | 0.95215                  | 0.61214  |
| 363 | 0.97046                   | 0.00452 | 0.85167                    | -0.25350 | 0.97167                | 0.00734 | 0.97037                  | 0.95147  |

**Table S2.** The concentration of Sn in solution at different pH (mol/L).

| <b>pH</b> | <b>0.5</b>            | <b>1</b>              | <b>1.5</b>            | <b>2</b>           | <b>2.5</b>         | <b>3</b>           | <b>3.5</b>           | <b>4</b>             | <b>4.5</b>            |
|-----------|-----------------------|-----------------------|-----------------------|--------------------|--------------------|--------------------|----------------------|----------------------|-----------------------|
| Cu        | $2.18 \times 10^7$    | $2.18 \times 10^6$    | $2.18 \times 10^5$    | $2.18 \times 10^4$ | $2.18 \times 10^3$ | $2.18 \times 10^2$ | 21.8                 | 2.18                 | $2.18 \times 10^{-1}$ |
| Fe        | $7.94 \times 10^{11}$ | $7.94 \times 10^{10}$ | $7.94 \times 10^9$    | $7.94 \times 10^8$ | $7.94 \times 10^7$ | $7.94 \times 10^6$ | $7.94 \times 10^5$   | $7.94 \times 10^4$   | $7.94 \times 10^3$    |
| Ni        | $1.99 \times 10^{12}$ | $1.99 \times 10^{11}$ | $1.99 \times 10^{10}$ | $1.99 \times 10^9$ | $1.99 \times 10^8$ | $1.99 \times 10^7$ | $1.99 \times 10^6$   | $1.99 \times 10^5$   | $1.99 \times 10^4$    |
| Zn        | $1.20 \times 10^{10}$ | $1.20 \times 10^9$    | $1.20 \times 10^8$    | $1.20 \times 10^7$ | $1.20 \times 10^6$ | $1.20 \times 10^5$ | $1.20 \times 10^4$   | $1.20 \times 10^3$   | $1.20 \times 10^2$    |
| Al        | $6.0 \times 10^8$     | $1.9 \times 10^6$     | $6.0 \times 10^4$     | $1.9 \times 10^3$  | $6.0 \times 10^1$  | 1.9                | $0.6 \times 10^{-1}$ | $1.9 \times 10^{-3}$ | $6.0 \times 10^{-5}$  |

**Table S3.** The content of the calcinating product.

| <b>Elements</b> | <b>Sn</b> | <b>Cu</b> | <b>Fe</b> |
|-----------------|-----------|-----------|-----------|
| Contents (wt%)  | 77.98     | 0.60      | 0.18      |
